# Supplementary material
Source: MDPI journal article supplement (https://www.mdpi.com/2075-4701/14/5/598)
Supplement: s1 [file s1 › metals-2892028-supplementary.pdf]

*Supplementary Material for the Article*

# Batch Sintering of FeO·OH and Fe<sub>2</sub>O<sub>3</sub> Blends: Chemical and Metallurgical Characterization

Igor J. U. V. Pereira <sup>1</sup>, Henrique C. S. Coelho <sup>1</sup>, Cláudio G. Santos <sup>2</sup>, Eduardo A. Brocchi <sup>3</sup>, Rodrigo F. M. Souza <sup>3</sup>  
and Victor A. A. Oliveira <sup>1,\*</sup>

<sup>1</sup> Thermal Analysis and Non-Ferrous Extractive Metallurgy Laboratory, Department of Metallurgical and Materials Engineering, Universidade Federal de Ouro Preto, Ouro Preto 35400-000, MG, Brazil; igorjurandir@gmail.com (I.J.U.V.P.); henrique1990c@gmail.com (H.C.S.C.)

<sup>2</sup> Polymer Analysis Laboratory, Department of Chemistry, Universidade Federal de Ouro Preto, Ouro Preto 35400-000, MG, Brazil; claudio@ufop.edu.br

<sup>3</sup> Pyrometallurgy and Multiphysics Laboratory, Department of Chemical and Materials Engineering, Pontifícia Universidade Católica do Rio de Janeiro (PUC-Rio), Rio de Janeiro 22451-900, RJ, Brazil; ebrocchi@puc-rio.br (E.A.B.); rsouza@puc-rio.br (R.F.M.S.)

\* Correspondence: victor@ufop.edu.br

## i) X-ray diffractometry

The acquisition configuration of the equipment used to obtain the XRD is presented in table S1. Rietveld method was applied to determine the constituent minerals of the sample. To avoid potential issues that may arise from the mixing of an internal standard with the sample, the external standard method, also named G-method, was employed [1, 2]. This technique requires the recording of two patterns under identical diffractometer configuration and conditions [1].

Table S1. Acquisition configurations for the X-ray experiments.

|                 |                              |
|-----------------|------------------------------|
| Instrument      | Malvern Panalytical Empyrean |
| Radiation       | Cu K $\alpha$ 1,2            |
| Geometry        | Bragg-Brentano               |
| Divergence slit | 1/4°                         |
| Generator       | 45kV, 40 mA                  |
| Mirror          | BBHD®                        |
| Range           | 10 – 83°2 $\theta$           |
| Step width      | 0.0131                       |
| Counting time   | 78.795 s                     |
| Detector        | PIXcel1D-Medipix3            |
| Rotation        | 1Hz                          |

Silicon powder used in the external standard method was the well-known SRM 640f [3]. This material was used due to its high-purity. To compute scale factor without normalizing to 100 %, the factor K [4] shall be known, therefore Eq. (S1) [1] should be used.

$$K = s_{Si} \frac{\rho_{Si} V_{Si}^2 \mu_{Si}}{C_{Si}} \quad (\text{Eq. S1})$$

where  $s_{Si}$  is the Rietveld scale factor,  $\rho_{Si}$  is the density,  $V_{Si}$  is the unit-cell volume,  $C_{Si}$  is the weight fraction, and  $\mu_{Si}$  is the mass attenuation factor (MAC). The subscript Si signifies that the parameters refer to silicon. The models employed for the Rietveld refinement of each identified phase along with their corresponding ICDD codes are shown in Table S2.

Table S2. Models employed for the Rietveld refinement.

| Phase            | ICDD code   | MAC (cm <sup>2</sup> /g) |
|------------------|-------------|--------------------------|
| Hematite         | 00-033-0664 | 220,77                   |
| Magnetite        | 00-019-0629 | 228,02                   |
| Quartz [5]       | 01-085-0795 | 34,84                    |
| Goethite [6]     | 01-084-8278 | 201,66                   |
| Kaolinite        | 00-058-2005 | 29,79                    |
| Dickite          | 00-058-2002 | 30,25                    |
| Chabazite-Mg [7] | 04-017-9135 | 33,82                    |

Copper radiation for iron containing materials leads to a high background due to fluorescence. To minimize this effect the pulse height distribution (PHD) was set to a range of 50-80%, this leads to increase in peak-to-noise ratio [8]. To achieve good particle statistics and minimize the microabsorption effects [9], the samples were milled in a vibratory disc mill with acetone, as this increases the efficiency of grinding [10], resulting in an approximate d<sub>50</sub> value of 8  $\mu$ m.

Table S3. Particle size distribution of the sample G\_SF and H\_SF.

| Particle size (mm) | >6.3 | > 1.0 | >0.71 | >0.3  | >0.150 | <0.150 |
|--------------------|------|-------|-------|-------|--------|--------|
| G_SF (% wt.)       | 0    | 3.41  | 14.06 | 32.43 | 23.93  | 26.18  |
| H_SF (% wt.)       | 7.43 | 22.66 | 16.43 | 17.11 | 16.34  | 20.03  |

|                |       |       |       |        |        |
|----------------|-------|-------|-------|--------|--------|
| Limestone (mm) | > 5.6 | > 3.0 | > 1.0 | > 0.21 | < 0.21 |
| Mass (% wt.)   | 0.0   | 10.8  | 23.1  | 27.3   | 38.8   |
| Coque (mm)     | > 5.0 | > 3.0 | > 1.0 | > 0.21 | < 0.21 |
| Mass (% wt.)   | 3.5   | 2.6   | 63.6  | 21.4   | 8.7    |

The image contains several technical drawings of a mechanical device, likely a hopper or feeder system. The drawings include:

- Top View:** A perspective view of the hopper assembly, showing a conical hopper (1) mounted on a frame (3).
- Side View:** A side view of the hopper assembly, showing the hopper (1) and the frame (3). It includes a curved discharge chute (2) with a 45° bend and a motor (4) driving the system.
- Sectional Views:**
  - VISTA-AA:** A cross-sectional view of the hopper body, showing dimensions 280, 1b, 1a, 1d, 1e, 201, 54.54, 250, 1f, 1h, 1j, and 138.
  - VISTA-A:** A cross-sectional view of the hopper body, showing dimensions 280, 1b, 1c, 1a, 1e, 201, 54.54, 250, 1f, 1h, 1j, and 138.
  - pos-1j:** A detail view of a component, showing dimensions 5, 104, 17, 244, 8, 8, and 27.
  - pos-2a:** A detail view of a component, showing dimensions 80, 182, 152, and  $\phi 102$ .
  - pos-3c:** A detail view of a component, showing dimensions 150, 150, and  $R21$ .

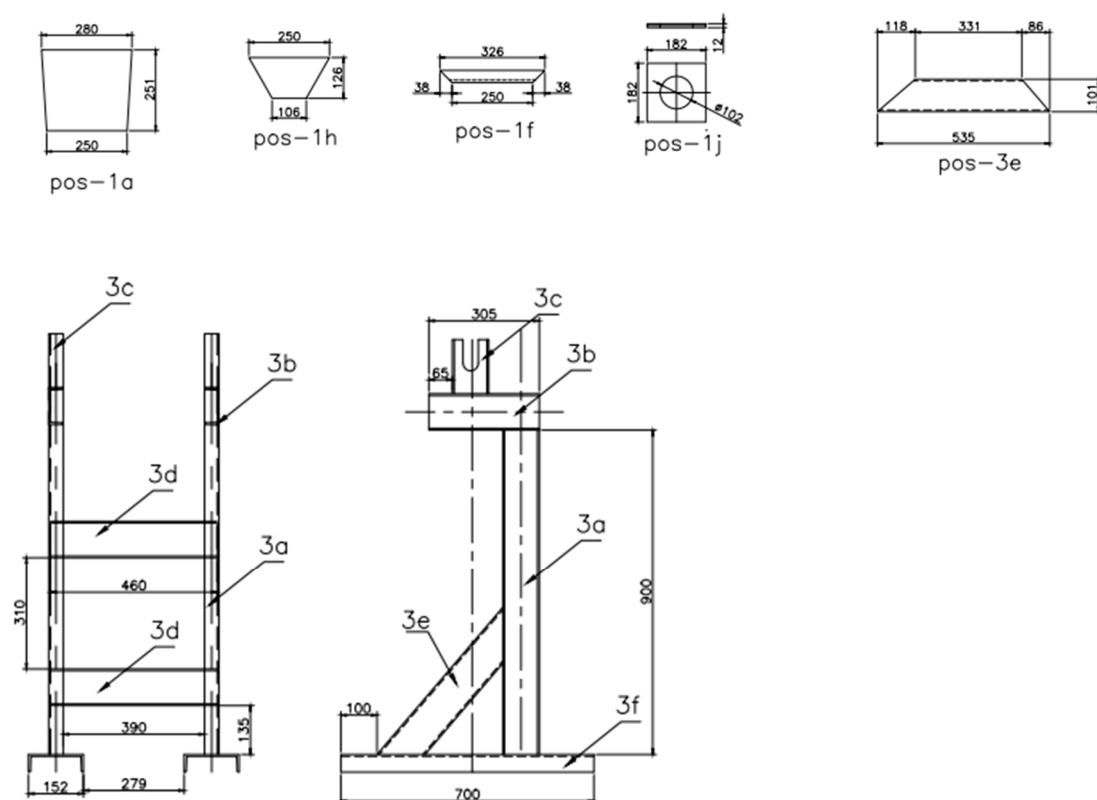

Figure S1. Dimensions (mm) and layout of the sinter plant.

Table S5. Specifications for the structural materials used in the sinter plant.

| Reference | Quantity | Description                 | Material |
|-----------|----------|-----------------------------|----------|
| 1         | 4 sets   |                             | -        |
| 1a        | 4        | Sheet 6.4 x 280 x 251 x 250 | ASTM A36 |
| 1b        | 2        | Angle 1" x 1/4 x 342        | ASTM A36 |
| 1c        | 2        | Angle 1" x 1/4 x 291        | ASTM A36 |
| 1d        | 2        | Round bar 1 1/2 x 200       | ASTM A36 |
| 1e        | 8        | Flat bar 1 1/2 x 1/4 x 247  | ASTM A36 |
| 1f        | 4        | Angle 1 1/2 x 5/16 x 326    | ASTM A36 |
| 1g        | 15       | Sheet 1/2 x 244 x 27        | ASTM A36 |
| 1h        | 4        | Sheet 6.4 x 250 x 126 x 106 | ASTM A36 |
| 1j        | 1        | Sheet 1/2 x 182 x 182       | ASTM A36 |
| 1m        | 4        | Square bar 3/8 x 245        | ASTM A36 |

|    |         |                             |          |
|----|---------|-----------------------------|----------|
| 2  | 1 pipe  |                             |          |
| 2a | 1       | Sheet ½ x 182 x 182         | ASTM A36 |
| 2b | 1       | Red asbestos 1/2" x 1500 mm | -        |
| 2c | 4       | Tube 45° 4" DIN 2440        | ASTM A36 |
| 2d | 1       | Tube 4" x 291 DIN 2440      | ASTM A36 |
| 2e | 1       | Tube 4" x 355 DIN 2440      | ASTM A36 |
| 2f | 1       | Tube 4" x 400 DIN 2440      | ASTM A36 |
| 2g | 1       | Butterfly valve 4"          | ASTM A36 |
| 3  | 1 easel |                             |          |
| 3a | 2       | Channel 4" x 8.03 x 900     | ASTM A36 |
| 3b | 2       | Channel 4" x 8.03 x 305     | ASTM A36 |
| 3c | 2       | Channel 4" x 8.03 x 150     | ASTM A36 |
| 3d | 2       | Channel 4" x 8.03 x 460     | ASTM A36 |
| 3e | 2       | Channel 4" x 8.03 x 535     | ASTM A36 |
| 3f | 2       | Channel 6" x 12.2 x 700     | ASTM A36 |

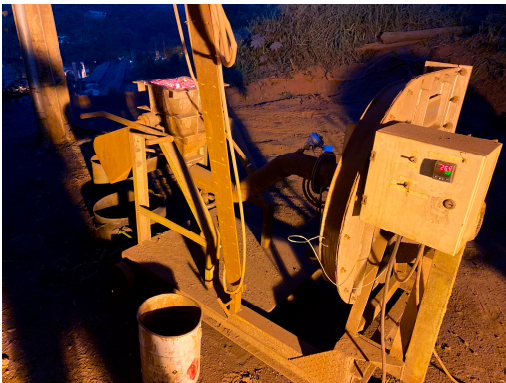

Figure S2. Sintering pilot plant

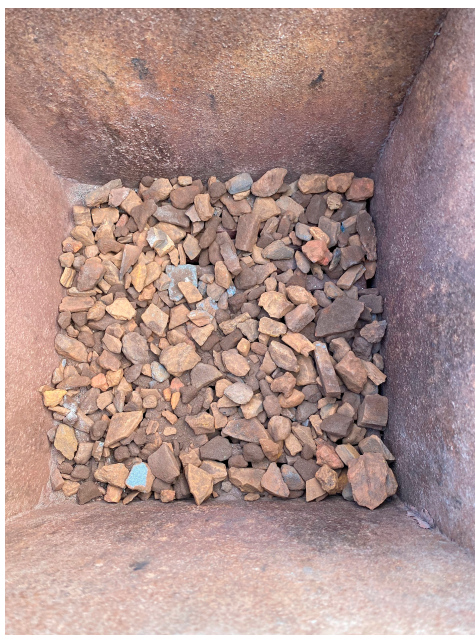

Figure S3. Bedding of granulated iron ore.

#### iv) Chemical analysis

##### Coke analysis

##### a) Moisture percentage

Pulverized coke (1.000 g) was dried at temperature of 150 °C for 12 minutes, and the percentage of mass loss during this process was determined as moisture content.

##### b) Determination of volatile material and fixed carbon

Dried pulverized coke (1.0000 g) was placed into a crucible, covered, and then subjected to a muffle furnace at a temperature of 950 °C for 1 hour. The percentage of mass loss during this process was determined as the volatile material, while the remaining mass in the crucible was attributed to fixed carbon.

##### c) Ash percentage

Dried pulverized coke (1.0000 g) was heated in a muffle furnace at 900 °C until a constant mass was achieved. The percentage of residual mass after burning was attributed to the ash percentage.

Table S6. Coke characterization.

| Fixed carbon | Ash   | Volatile matter | Moisture |
|--------------|-------|-----------------|----------|
| 78.4 %       | 6.7 % | 9.5 %           | 5.4 %    |

## Flux analysis

Table S7. Chemical composition of the limestone.

| Fe    | CaO    | Mn    | S      | P      | SiO2  | Al2O3 | MgO   |
|-------|--------|-------|--------|--------|-------|-------|-------|
| 3.7 % | 56.0 % | 0.1 % | 0.07 % | 0.12 % | 2.5 % | 1.0 % | 1.0 % |

## Sintering bed analysis

Table S8. Chemical analysis of the mixes used as feed material in the sintering process.

|           | 0%G_SF | 10%G_SF | 20%G_SF | 30%G_SF | 40%G_SF |
|-----------|--------|---------|---------|---------|---------|
| SiO2 (%)  | 5.7    | 6.0     | 6.3     | 6.6     | 6.9     |
| Fe (%)    | 53.9   | 53.4    | 52.9    | 52.4    | 51.9    |
| Al2O3 (%) | 1.3    | 1.4     | 1.6     | 1.7     | 1.8     |
| Mn (%)    | 0.05   | 0.1     | 0.2     | 0.3     | 0.4     |
| P (%)     | 0.04   | 0.05    | 0.05    | 0.05    | 0.05    |
| S (%)     | 0.02   | 0.02    | 0.02    | 0.03    | 0.03    |
| MgO (%)   | 0.10   | 0.09    | 0.09    | 0.09    | 0.08    |
| K2O (%)   | -      | 0.01    | 0.01    | 0.02    | 0.03    |
| Cr2O3 (%) | 0.28   | 0.28    | 0.27    | 0.26    | 0.25    |
| TiO2 (%)  | -      | 0.01    | 0.02    | 0.03    | 0.04    |
| LOI (%)   | 2.4    | 2.9     | 3.3     | 3.8     | 4.2     |
| Custo     | X      | 0.93X   | 0.86X   | 0.79X   | 0.72X   |
| Basicity  | 0.60   | 0.57    | 0.55    | 0.53    | 0.51    |
| Slag (%)  | 16.29  | 16.97   | 17.66   | 18.34   | 19.02   |

Fixed carbon = 3.9%; CaO = 3.5 %.

## v) Sinter characterization

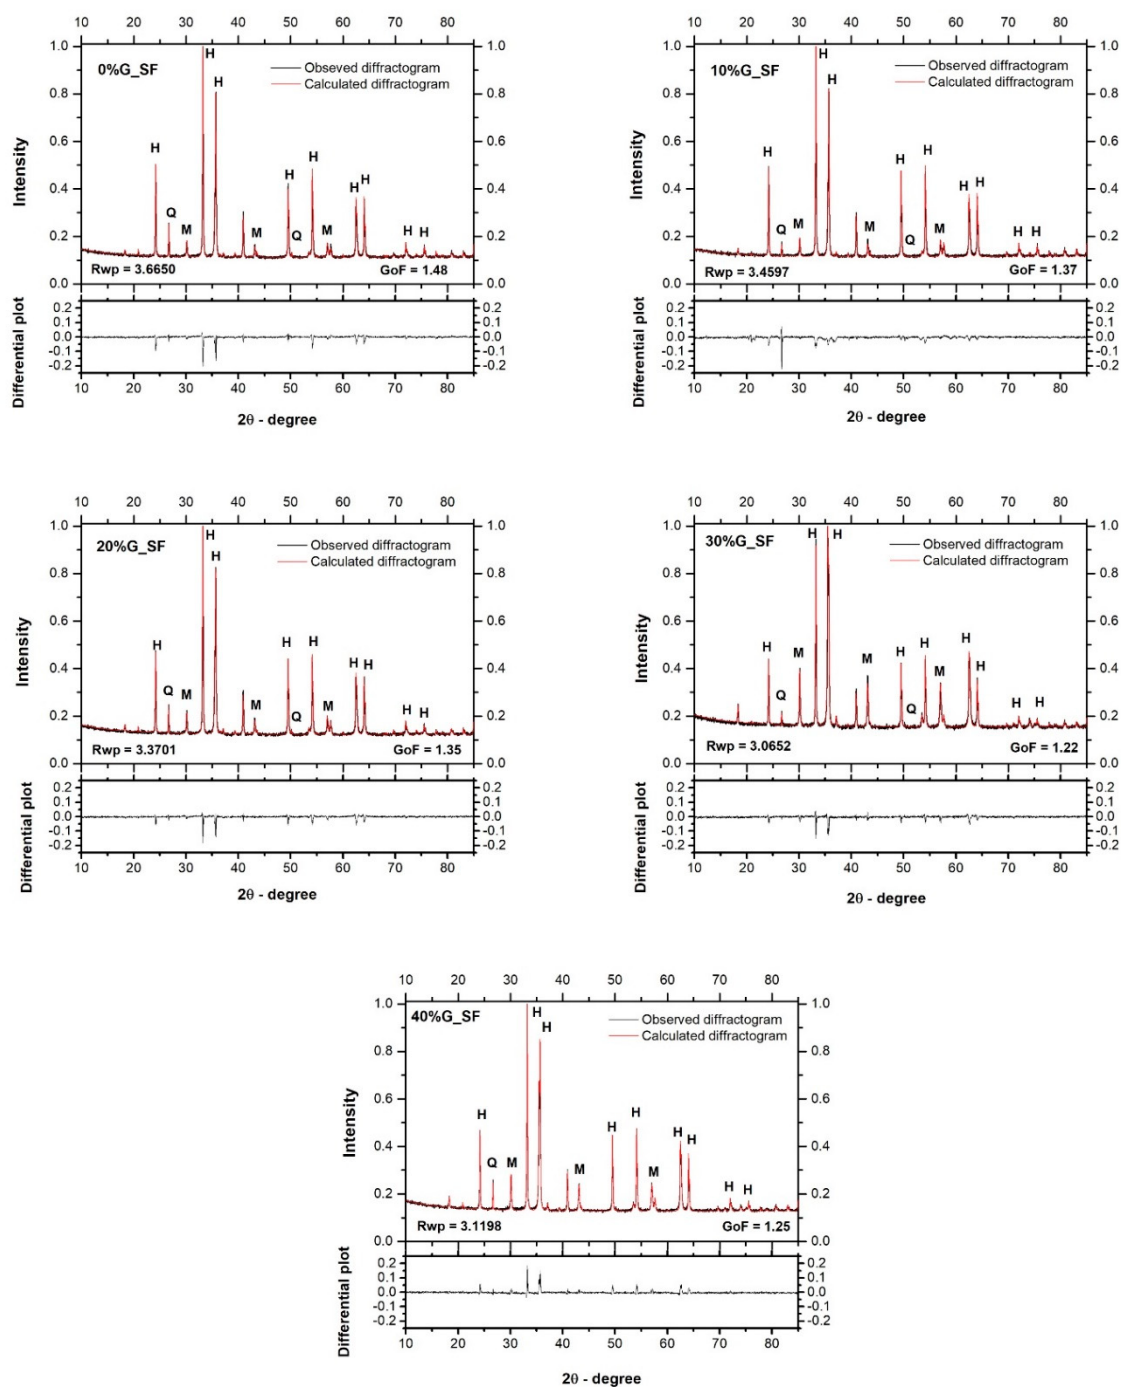

Figure S4. Observed and calculated diffractogram to the different sinters.

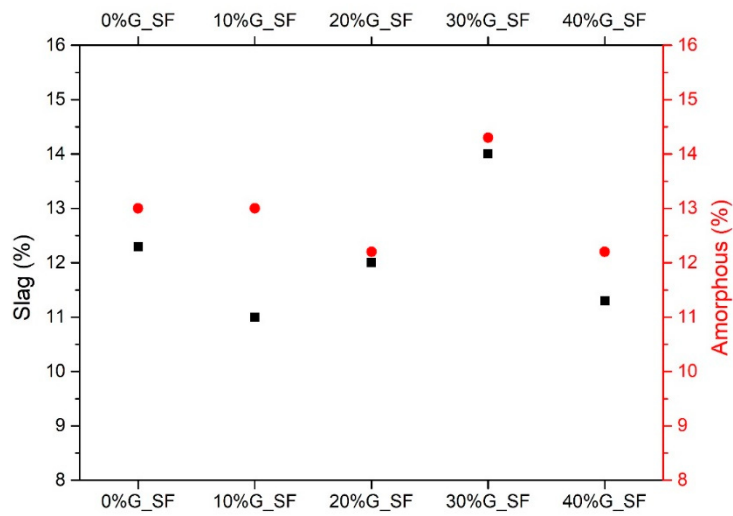

Figure S5. Correlation between the % of slag and the % of amorphous in the sinters.

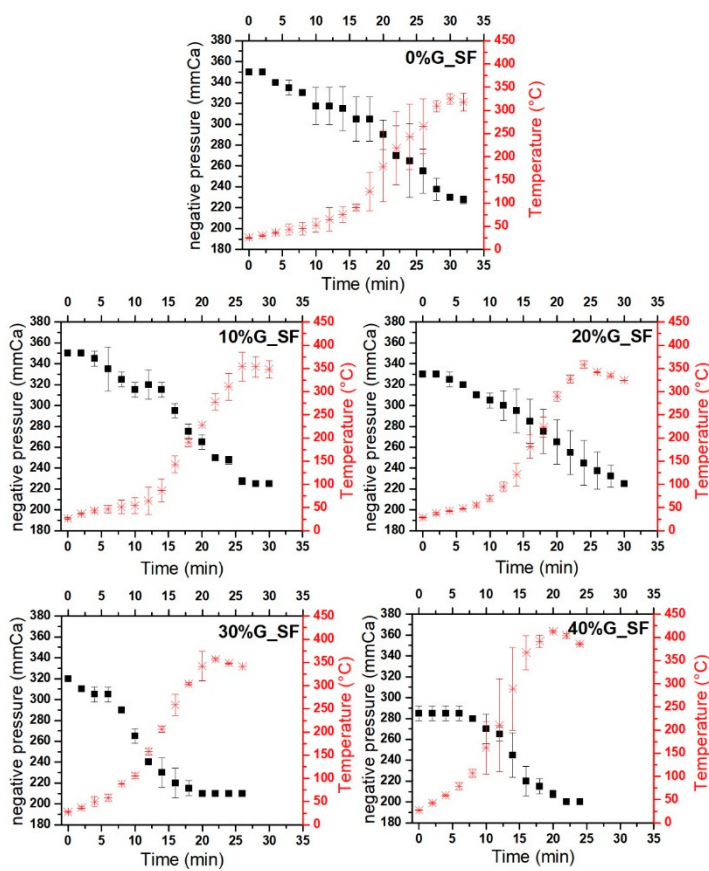

Figure S6. Sintering bed negative pressure and temperature of the gas at the windbox.

## References in this supplementary document:

1. Dittrich, S., et al., Does Ordinary Portland Cement contain amorphous phase? A quantitative study using an external standard method. *Powder Diffraction*, 2011. 26(1): p. 31-38.
2. Aranda\*, M.A.G., Á.G. De la Torre, and L. León-Reina, Rietveld Quantitative Phase Analysis of OPC Clinkers, Cements and Hydration Products. *Reviews in Mineralogy and Geochemistry*, 2012. 74(1): p. 169-209.
3. Black, D.R., et al., Certification of SRM 640f line position and line shape standard for powder diffraction. *Powder Diffraction*, 2020. 35(3): p. 156-159.
4. O'Connor, B.H. and M.D. Raven, Application of the Rietveld Refinement Procedure in Assaying Powdered Mixtures. *Powder Diffraction*, 1988. 3(1): p. 2-6.
5. Young, R.A., P.E. Mackie, and R.B. von Dreele, Application of the pattern-fitting structure-refinement method of X-ray powder diffractometer patterns. *Journal of Applied Crystallography*, 1977. 10(4): p. 262-269.
6. Zepeda-Alarcon, E., et al., Magnetic and nuclear structure of goethite ([alpha]-FeOOH): a neutron diffraction study. *Journal of Applied Crystallography*, 2014. 47(6): p. 1983-1991.
7. Montagna, G., et al., Chabazite-Mg: a new natural zeolite of the chabazite series. *American Mineralogist*, 2010. 95(7): p. 939-945.
8. Mos, Y.M., et al., X-Ray Diffraction of Iron Containing Samples: The Importance of a Suitable Configuration. *Geomicrobiology Journal*, 2018. 35(6): p. 511-517.
9. McCusker, L.B., et al., Rietveld refinement guidelines. *Journal of Applied Crystallography*, 1999. 32(1): p. 36-50.
10. Bish, D.L. and R.C. Reynolds, Sample preparation for X-ray diffraction. *Reviews in Mineralogy and Geochemistry*, 1989. 20(1): p. 73-99.
